# Supplementary material for: Photoelectrochemical reduction of N2 to NH3 under ambient conditions through hierarchical MoSe2@g-C3N4 heterojunctions
Source: Royal Society of Chemistry journal article supplement (doi:10.1039/d0ta10620h), 2020-12-17
Supplement: d0ta10620h1.pdf [file d0ta10620h1.pdf]

## **Photoelectrochemical Reduction of N<sub>2</sub> to NH<sub>3</sub> under Ambient Conditions through Hierarchical MoSe<sub>2</sub>@g-C<sub>3</sub>N<sub>4</sub> Heterojunctions**

Muhammad Asim Mushtaq,<sup>ab</sup> Muhammad Arif,<sup>ab</sup> Xiaoyu Fang,<sup>b</sup> Ghulam Yasin,<sup>a</sup> Wen Ye,<sup>b</sup> Majid Basharat,<sup>a</sup> Bo Zhou,<sup>b</sup> Shiyu Yang,<sup>b</sup> Shengfu Ji,<sup>\*a</sup> and Dongpeng Yan<sup>\*ab</sup>

<sup>a</sup>State Key Laboratory of Chemical Resource Engineering, Beijing University of Chemical Technology, Beijing 100029, People's Republic of China.

<sup>b</sup>Beijing Key Laboratory of Energy Conversion and Storage Materials, College of Chemistry, Beijing Normal University, Beijing 100875, People's Republic of China.

\*Corresponding authors:

Dongpeng Yan

Email: [yandp@bnu.edu.cn](mailto:yandp@bnu.edu.cn)

Shengfu Ji

Email: [jisf@mail.buct.edu.cn](mailto:jisf@mail.buct.edu.cn)

## 1. Photoelectrochemical measurements

All PEC measurements were performed at ambient conditions on CHI 760E electrochemical workstation with a gas-tight two-compartment H-type cell separated through a Nafion 211 membrane. Prior to use, the membrane was treated in 5% H<sub>2</sub>O<sub>2</sub> and 0.5 M H<sub>2</sub>SO<sub>4</sub> aqueous solution, followed by DI water at 80 °C for 1 h and finally rinsed with DI water. For future use, all membranes were immersed in DI water. Pt mesh (1×1 cm<sup>2</sup>) was utilized as a counter electrode while Ag/AgCl/sat. KCl was performed as a reference electrode. All measured potential was calibrated to the reversible hydrogen electrode (RHE) by Nernst equation ( $E_{\text{RHE}} = E_{\text{Ag/AgCl}} + 0.197 + 0.059 \text{ pH}$ ). Xenon (Xe) arc lamp of 300 W from Newport Corporation tailored with an air mass (AM) 1.5 G filter was used for light illumination. The power density of the Xe arc lamp was corrected as 100 mW cm<sup>-2</sup> and calibrated. All photoelectrocatalytic NRR assays were performed in 100 mL N<sub>2</sub> pre-saturated electrolytes, moreover pure N<sub>2</sub> consistently fed into the cathodic chamber of the cell. All applied potential were iR-compensated and geometric surface areas were obtained from current density values.

The average lifetime of the photogenerated electron-hole pairs calculated according to the following equation from the OCVD measurement (Equation 1).<sup>1</sup>

$$\tau_n = -\frac{K_B T}{q} \left( \frac{dV_\alpha}{dt} \right)^{-1} \quad (1)$$

where “ $\tau_n$ ” is the average lifetime of the photogenerated electron-hole pairs, “ $K_B$ ” is the Boltzmann constant, “ $T$ ” is the temperature (in Kelvin), “ $q$ ” is the elementary charge of an electron and “ $V_\alpha$ ” is the open-circuit voltage.

## 2. Determination of NH<sub>3</sub>

The  $\text{NH}_3$  concentration was quantitatively calculated by the indophenol blue method via UV–vis spectrophotometry. Firstly, 2 mL electrolyte was pipetted from the cathodic chamber after electrolysis of gaseous  $\text{N}_2$  and added into 2 mL of 1 M NaOH solution carry  $\text{C}_7\text{H}_6\text{O}_3$  (5 wt%) and  $\text{Na}_3\text{C}_6\text{H}_5\text{O}_7$  (5 wt%); furthermore, 1 mL of 0.05 M NaClO solution and 0.2 mL of  $\text{C}_5\text{FeN}_6\text{Na}_2\text{O}\cdot 2\text{H}_2\text{O}$  (1 wt%) coloring solution were added. Aliquots of electrolytes stained by indophenol blue and incubated for 2 h before UV–vis spectrophotometric measurements. For quantification of synthesized  $\text{NH}_3$ , a range of standard  $\text{NH}_4\text{Cl}$  solutions was utilized to established calibration curves. Background absorbance spectra of reference solutions (pure electrolytes) were also acquired to nullify the effects of electrolyte.

### 3. Detection of hydrazine

Watt and Chrisp's method was used to determine the traces of hydrazine ( $\text{N}_2\text{H}_4$ ) that exist in 0.1 M KOH electrolyte after electrolysis. A mixture of p- $\text{C}_9\text{H}_{11}\text{NO}$  (5.99 g), HCl (concentrated, 30 mL), and  $\text{C}_2\text{H}_5\text{OH}$  (300 mL) was utilized as a color reagent. Series of 5 mL  $\text{N}_2\text{H}_4$  standard solutions of concentrations 0.0, 0.3, 0.5, 0.7, 0.9, and 1.0  $\mu\text{g mL}^{-1}$  in 0.1 M HCl were made to construct calibration curve. Afterward, for each concentration 5 mL of  $\text{N}_2\text{H}_4$  standard solution was mixed with the 5 mL of the aforementioned color solution and stirred vigorously for 10 min at environmental temperature. The absorbance intensity of the resultant solutions was evaluated carefully at 455 nm, and  $\text{N}_2\text{H}_4$  yields were predicted with the standard calibration curve. A satisfactory linear connection of absorbance with  $\text{N}_2\text{H}_4\cdot\text{H}_2\text{O}$  concentration was observed from the calibration curve (Figure S23a).

### 4. Determination of $\text{NH}_3$ yield rate and Faradaic efficiency

$\text{NH}_3$  yield rate was estimated through the subsequent equation:

$$\text{Yield rate} = (\text{C}_{\text{NH}_3} \times V) / (t \times A) \quad (2)$$

where " $C_{NH_3}$ " is the concentration of produced  $NH_3$ , " $V$ " refers to electrolyte volume, " $t$ " is the reaction time and " $A$ " stands for the working electrode surface area. Considering that three electrons take part to create one  $NH_3$  molecule, the Faradaic efficiency was determined by the equation as follow:

$$\text{Faradaic efficiency} = (3F \times C_{NH_3} \times V) / 17 * Q \quad (3)$$

where " $F$ " is the Faraday constant and " $Q$ " represents the total charge pass through the electrode during  $N_2$  reduction reaction.

### 5. $^{15}N_2$ isotope labeling experiments

For the  $^{15}N_2$  isotopic labeling, the electrolyte was deaerated by Ar gas for 30 min. Later, feeding gas  $^{15}N_2$  was provided into the cathodic chamber for photoelectrolysis at  $-0.3$  V vs. RHE. After 6 h of electrolysis, the electrolyte was collected and kept pH = 7 with 0.5 M  $H_2SO_4$  solution, which was further concentrated through vacuum distillation. After being dissolved in  $D_2O$ , the sample was subjected to  $^1H$  nuclear magnetic resonance ( $^1H$  NMR) analysis.

### 6. Computational analysis

All computations were performed in the Vienna ab initio simulation package (VASP) within the framework of the density functional theory (DFT) and the projector augmented plane-wave approach.<sup>2</sup> Generalized gradient approximation is chosen for the exchange-correlation potential.<sup>3</sup> The DFT-D3 technique is used to describe the long-range van der Waals interaction.<sup>4</sup> The plane wave energy cut-off is fixed at 400 eV. In the iterative solution of the Kohn-Sham equation, the energy constraint is established at  $10^{-5}$  eV. Integration of the Brillouin zone attained at the Gamma point. All the structures are relaxed till the residual forces on the atoms decayed to  $<0.05$  eV  $\text{\AA}^{-1}$ . For all NRR, the Gibbs free energy ( $\Delta G$ ) was described as follows.<sup>5</sup>

$$\Delta G = \Delta E + \Delta E_{ZPE} - T\Delta S \quad (4)$$

where, " $\Delta E$ " denoted the energy of adsorption, " $\Delta E_{ZPE}$ " represent the zero-point energy changes,  $T=298.15$  K (room temperature), and " $\Delta S$ " is the variations in entropy.

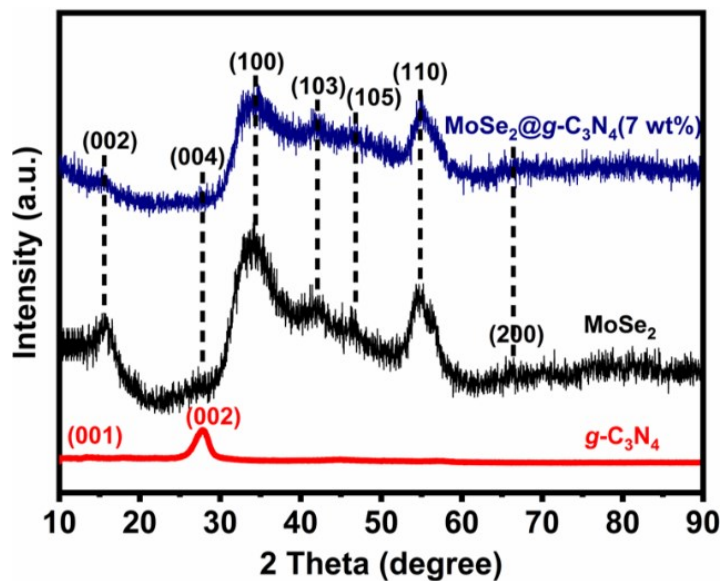

**Figure S1:** XRD pattern of  $g\text{-C}_3\text{N}_4$ ,  $\text{MoSe}_2$  and  $\text{MoSe}_2@g\text{-C}_3\text{N}_4$  (7 wt%) hybrid.

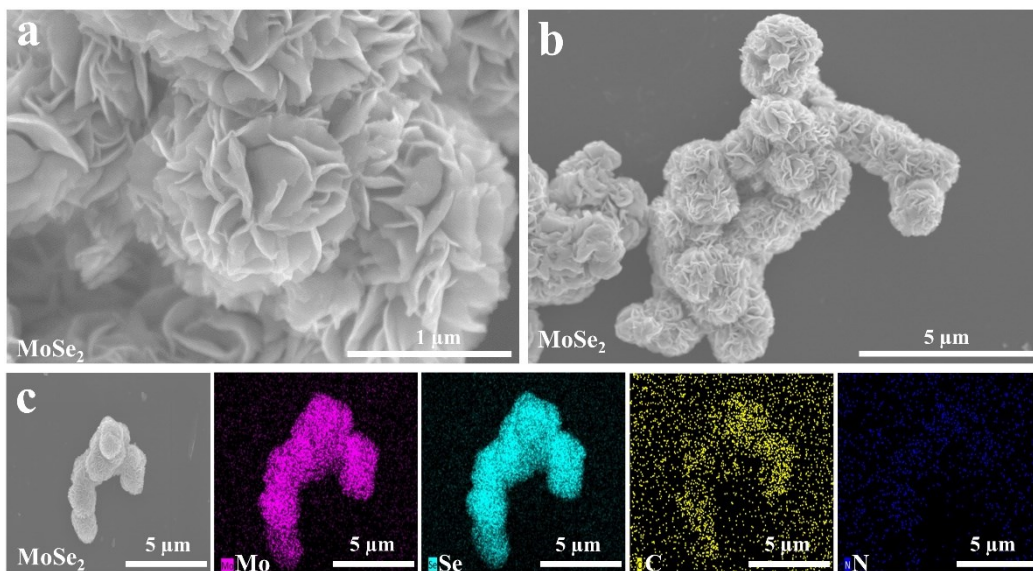

**Figure S2:** SEM images (a and b)  $\text{MoSe}_2$ , (c) EDS mapping of  $\text{MoSe}_2$ .

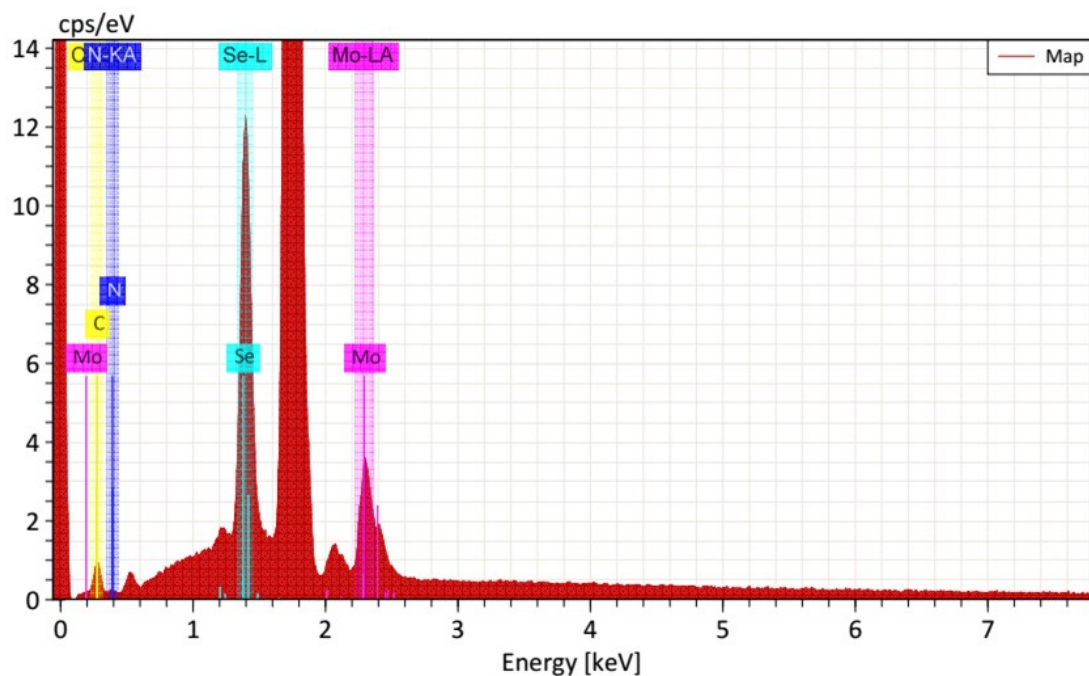

**Figure S3:** EDS spectrum of MoSe<sub>2</sub>.

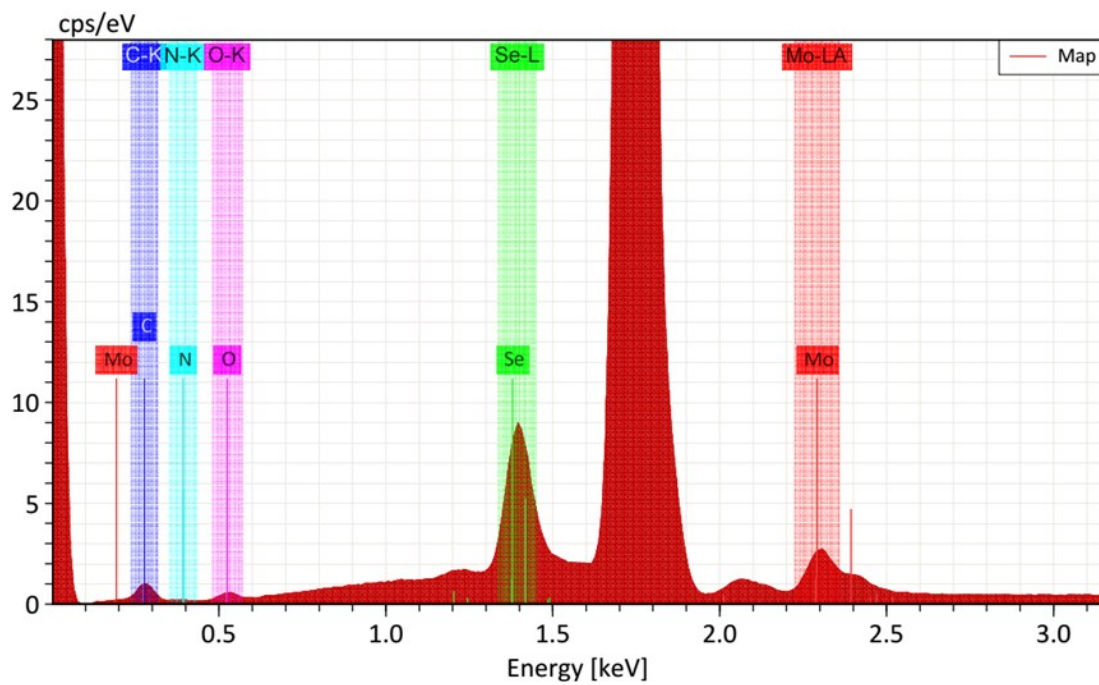

**Figure S4:** EDS spectrum of MoSe<sub>2</sub>@g-C<sub>3</sub>N<sub>4</sub> (7 wt%) hybrid.

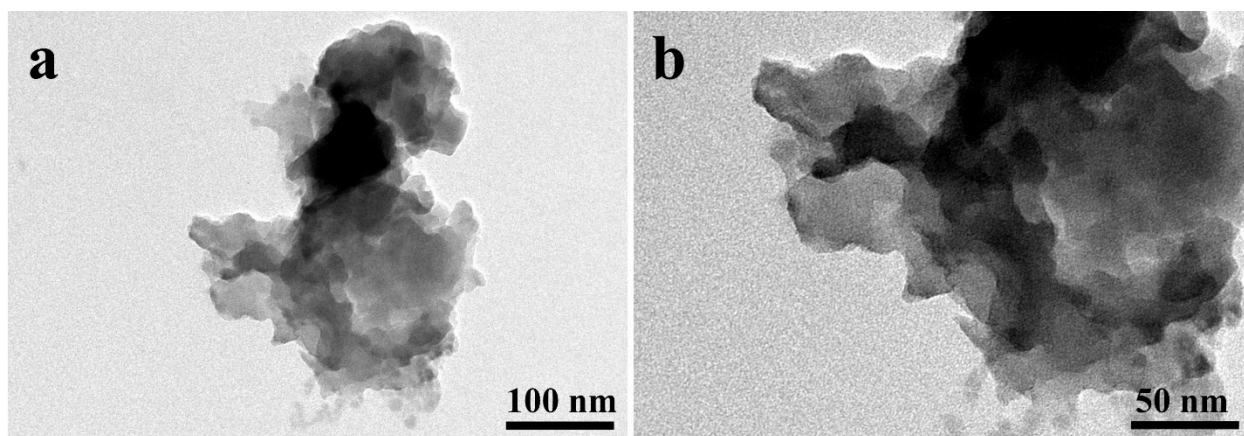

**Figure S5:** TEM images of pure  $g\text{-C}_3\text{N}_4$  nanosheets.

**Table S1:** The average fluorescence lifetimes of  $g\text{-C}_3\text{N}_4$  and  $\text{MoSe}_2@g\text{-C}_3\text{N}_4$  (7 wt%).

| Samples                                        | Lifetime $\tau$ | Pre-exponential factors $B$ | Average lifetime $\tau$ |
|------------------------------------------------|-----------------|-----------------------------|-------------------------|
|                                                | ns              |                             | ns                      |
| $g\text{-C}_3\text{N}_4$                       | $\tau_1=0.44$   | $B_1=95.28$                 | 2.548                   |
|                                                | $\tau_2=5.78$   | $B_2=4.72$                  |                         |
| $\text{MoSe}_2@g\text{-C}_3\text{N}_4$ (7 wt%) | $\tau_1=1.45$   | $B_1=52.98$                 | 11.001                  |
|                                                | $\tau_2=6.70$   | $B_2=32.64$                 |                         |
|                                                | $\tau_3=34.50$  | $B_3=14.38$                 |                         |

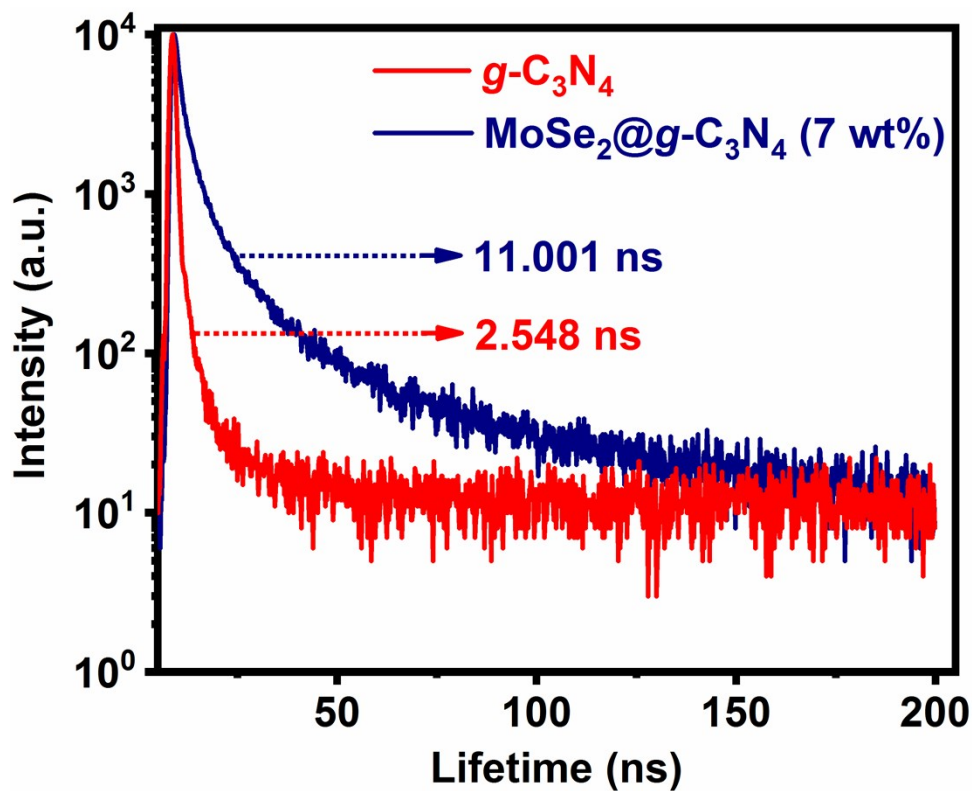

**Figure S6:** Fluorescence lifetime spectra of  $g\text{-C}_3\text{N}_4$  and  $\text{MoSe}_2@g\text{-C}_3\text{N}_4$  (7 wt%) heterostructures at an excitation wavelength of 325 nm.

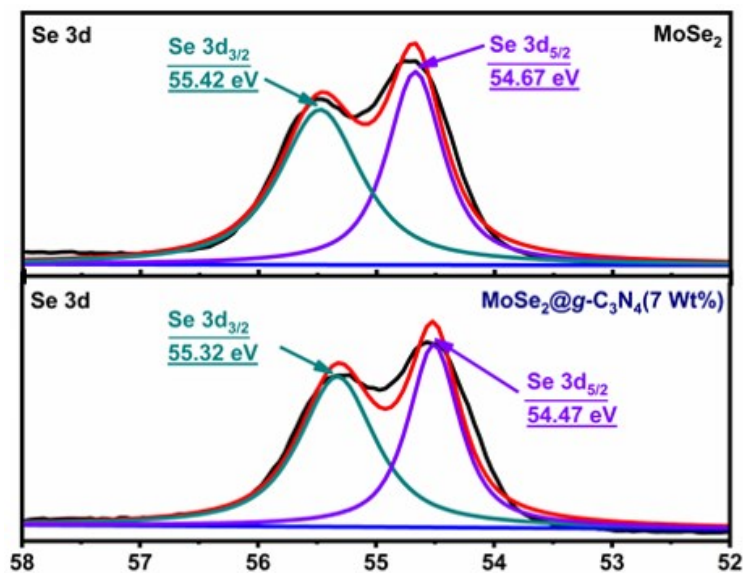

**Figure S7:** Se 3d spectra of  $\text{MoSe}_2$  and  $\text{MoSe}_2@g\text{-C}_3\text{N}_4$  hybrid (7 wt%).



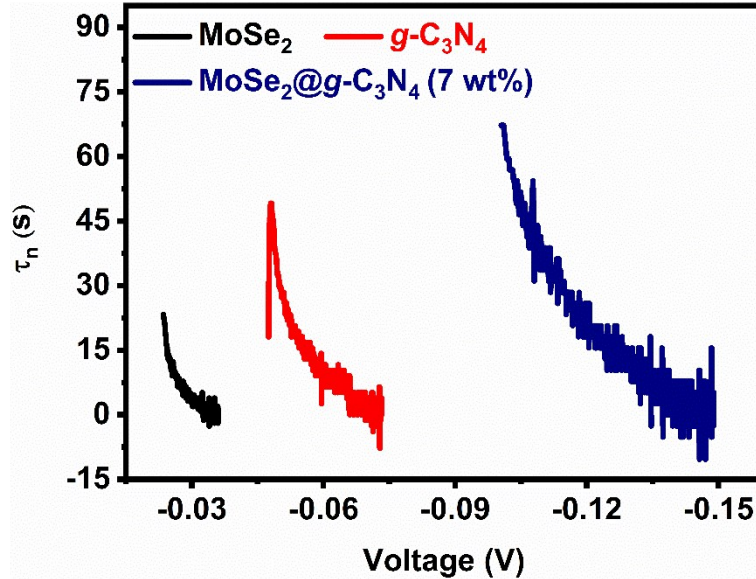

**Figure S8:** Average lifetimes of the photogenerated carriers ( $\tau_n$ ) obtained from the OCVD measurement for g-C<sub>3</sub>N<sub>4</sub>, MoSe<sub>2</sub> and MoSe<sub>2</sub>@g-C<sub>3</sub>N<sub>4</sub> (7 wt%) hybrid.

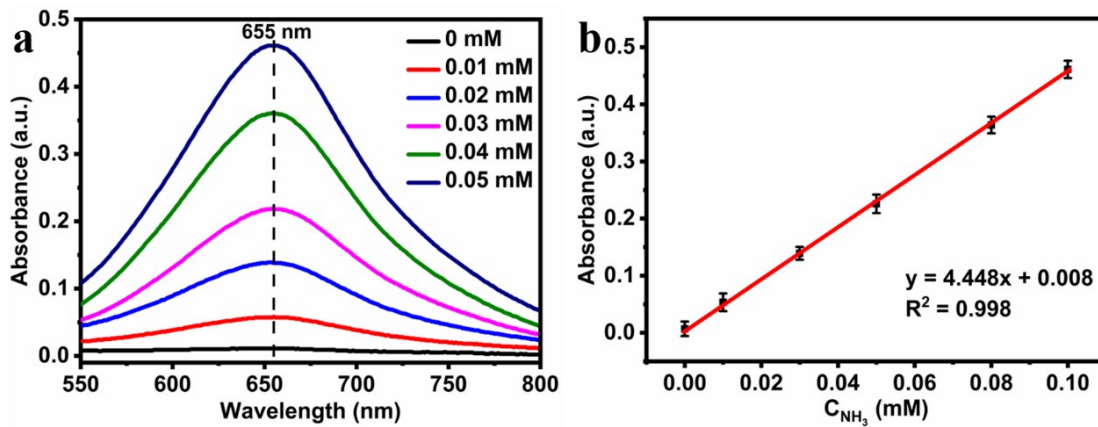

**Figure S9:** (a) UV-vis absorption spectra of indophenol assays with NH<sub>4</sub><sup>+</sup> ions in 0.1 M KOH electrolyte after incubated for 2 h at room temperature, (b) Calibration curve used for estimation of NH<sub>3</sub> by NH<sub>4</sub><sup>+</sup> ion concentration.

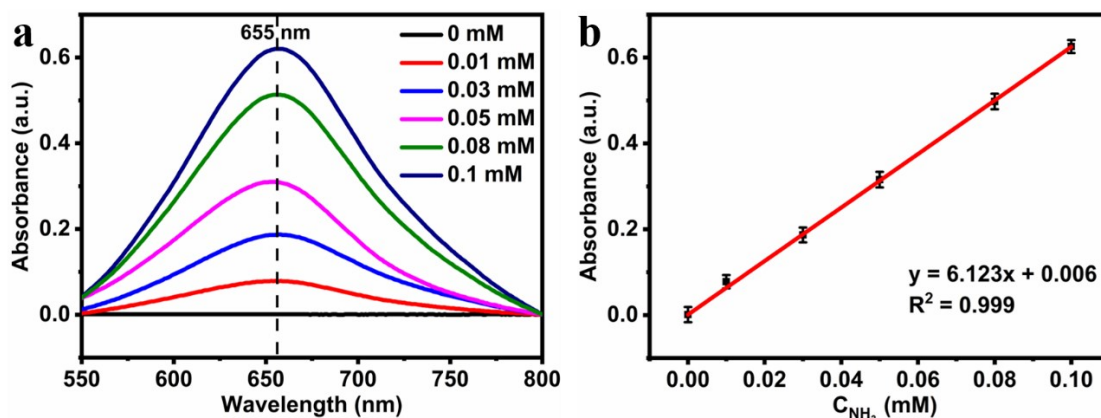

**Figure S10:** (a) UV-vis absorption spectra of indophenol assays with  $\text{NH}_4^+$  ions in 0.05 M  $\text{H}_2\text{SO}_4$  electrolyte after incubated for 2 h at room temperature, (b) Calibration curve used for estimation of  $\text{NH}_3$  by  $\text{NH}_4^+$  ion concentration.

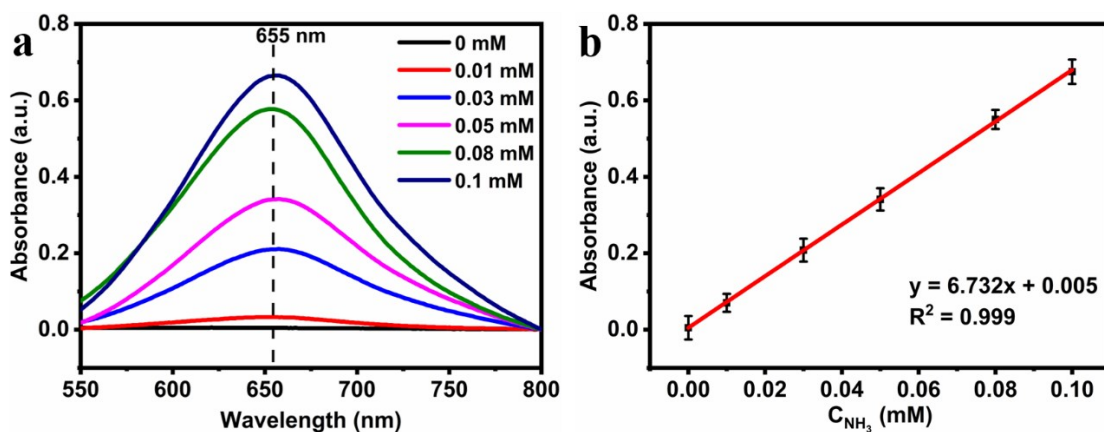

**Figure S11:** (a) UV-vis absorption spectra of indophenol assays with  $\text{NH}_4^+$  ions in 0.1 M  $\text{Na}_2\text{SO}_4$  electrolyte after incubated for 2 h at room temperature, (b) Calibration curve used for estimation of  $\text{NH}_3$  by  $\text{NH}_4^+$  ion concentration.

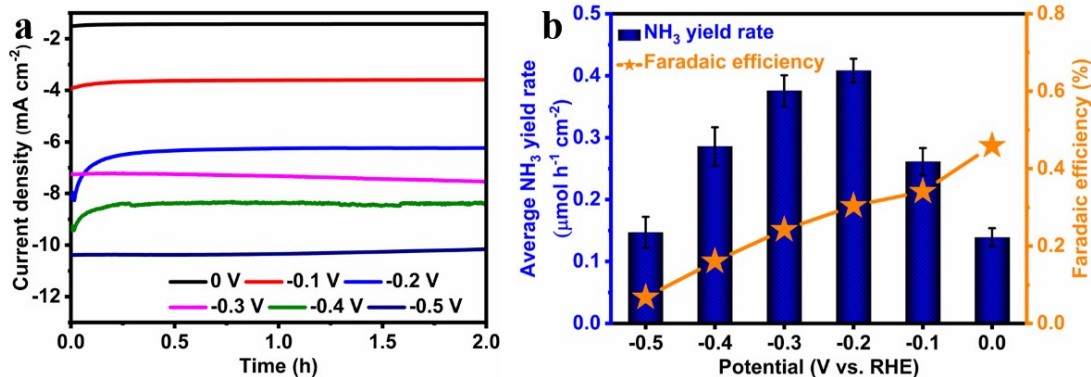

**Figure S12 :** (a) Chronoamperometric results of electrocatalysis of N<sub>2</sub> by using MoSe<sub>2</sub> in 0.05 M H<sub>2</sub>SO<sub>4</sub> electrolyte at potential ranging from 0 V to -0.5 V vs. RHE for 2 h without illumination, (b) Corresponding NH<sub>3</sub> yield rates and Faradaic efficiencies.

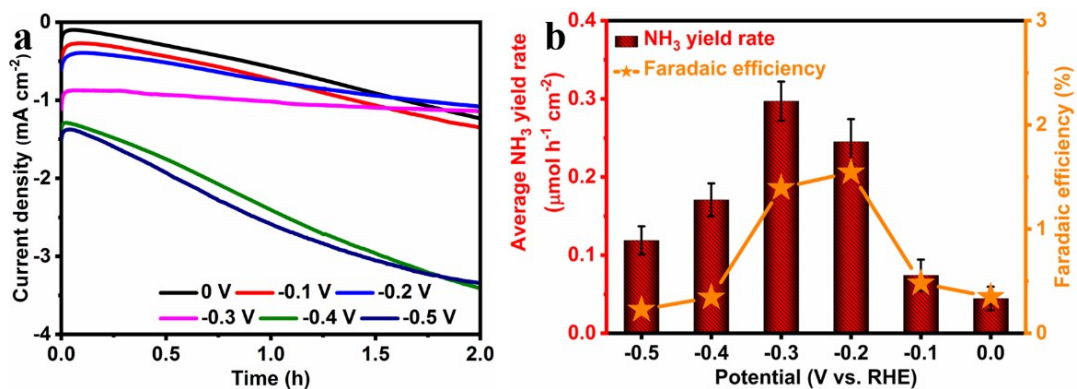

**Figure S13:** (a) Chronoamperometric results of electrocatalysis of N<sub>2</sub> by using MoSe<sub>2</sub> in 0.1 M Na<sub>2</sub>SO<sub>4</sub> electrolyte at potential ranging from 0 V to -0.5 V vs. RHE for 2 h without illumination, (b) Corresponding NH<sub>3</sub> yield rates and Faradaic efficiencies.

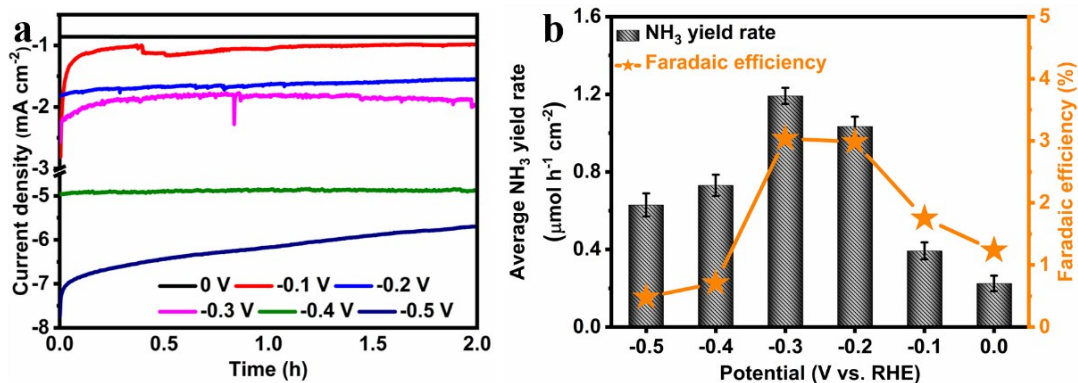

**Figure S14:** (a) Chronoamperometric results of electrocatalysis of N<sub>2</sub> by using MoSe<sub>2</sub> in 0.1 M KOH electrolyte at potential ranging from 0 V to -0.5 V vs. RHE for 2 h without illumination, (b) Corresponding NH<sub>3</sub> yield rates and Faradaic efficiencies.

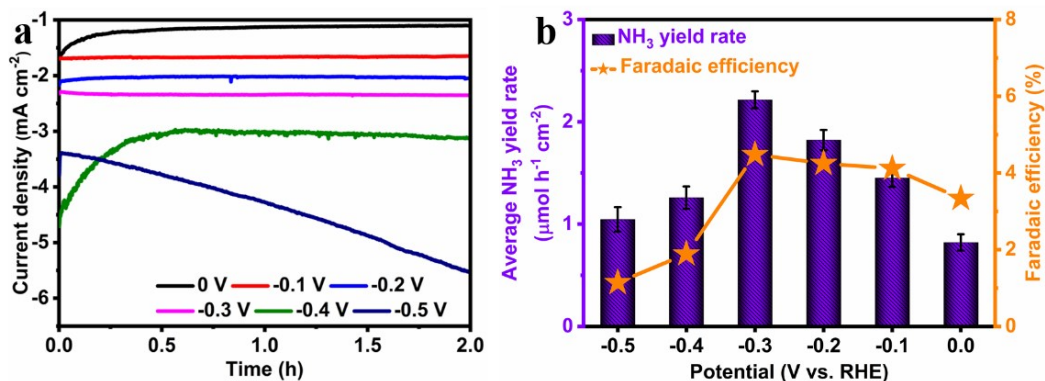

**Figure S15:** (a) Chronoamperometric results of photoelectrocatalysis of N<sub>2</sub> by using g-C<sub>3</sub>N<sub>4</sub> in 0.1 M KOH electrolyte at potential ranging from 0 V to -0.5 V vs. RHE for 2 h under illumination, (b) Corresponding NH<sub>3</sub> yield rates and Faradaic efficiencies.

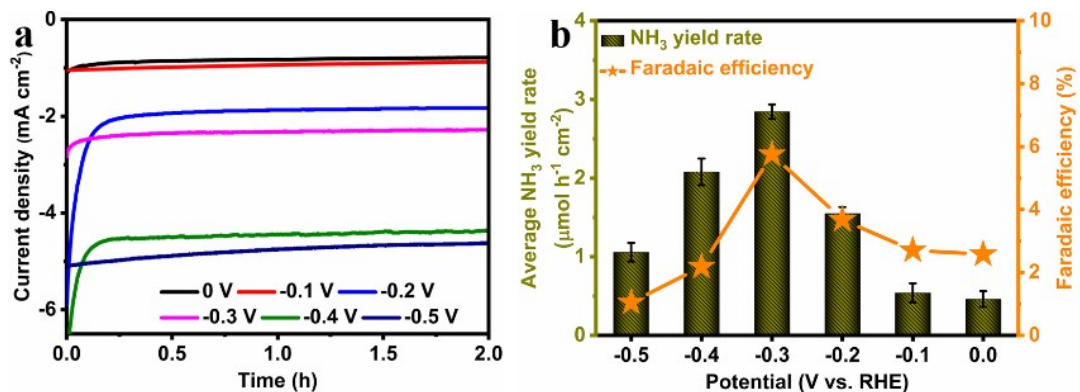

**Figure S16:** (a) Chronoamperometric results of photoelectrocatalysis of N<sub>2</sub> by using MoSe<sub>2</sub> in 0.1 M KOH electrolyte at potential ranging from 0 V to -0.5 V vs. RHE for 2 h under illumination, (b) Corresponding NH<sub>3</sub> yield rates and Faradaic efficiencies.

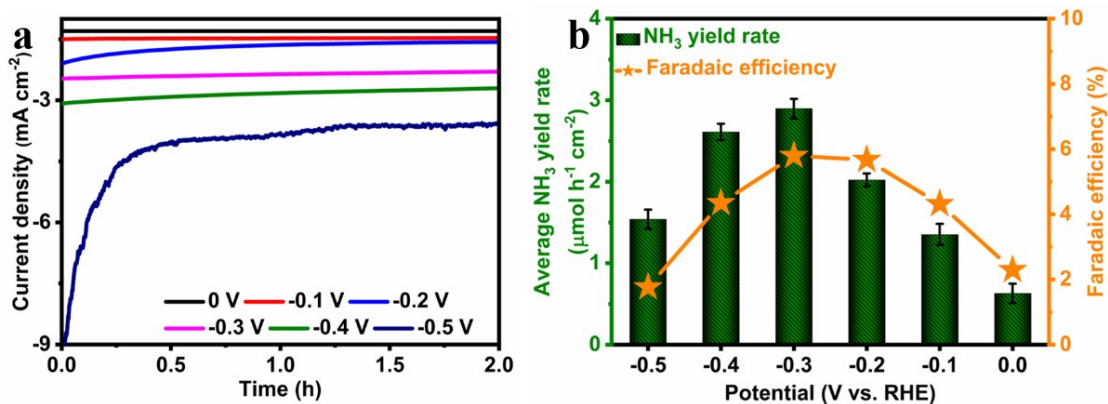

**Figure S17:** (a) Chronoamperometric results of photoelectrocatalysis of N<sub>2</sub> by using MoSe<sub>2</sub>@g-C<sub>3</sub>N<sub>4</sub> (1 wt%) in 0.1 M KOH electrolyte at potential ranging from 0 V to -0.5 V vs. RHE for 2 h under illumination, (b) Corresponding NH<sub>3</sub> yield rates and Faradaic efficiencies.



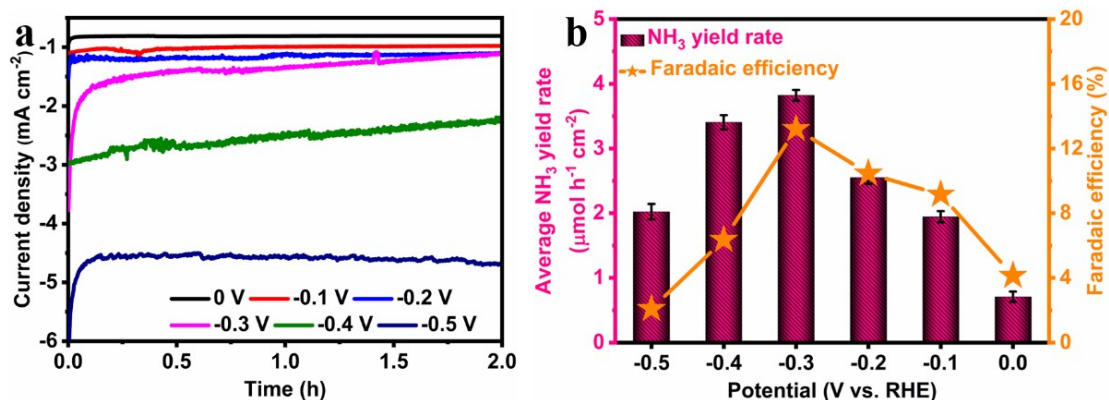

**Figure S18:** (a) Chronoamperometric results of photoelectrocatalysis of N<sub>2</sub> by using MoSe<sub>2</sub>@g-C<sub>3</sub>N<sub>4</sub> (3 wt%) in 0.1 M KOH electrolyte at potential ranging from 0 V to -0.5 V vs. RHE for 2 h under illumination, (b) Corresponding NH<sub>3</sub> yield rates and Faradaic efficiencies.

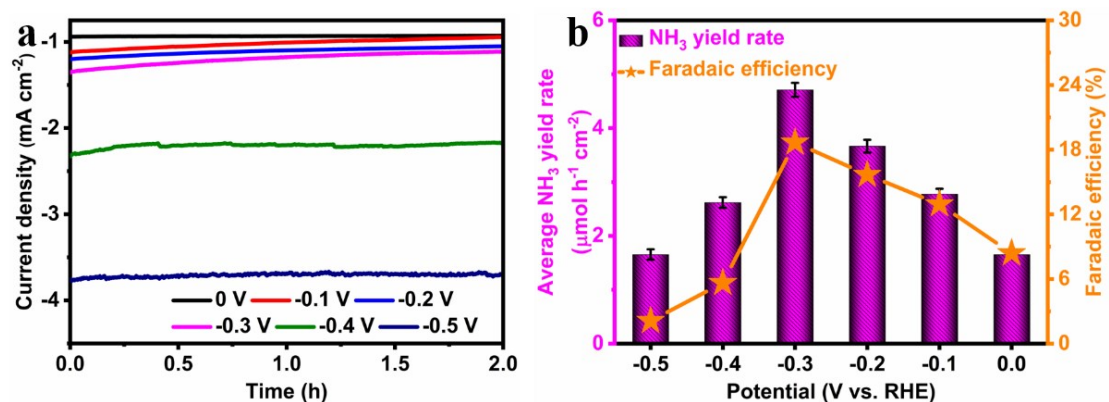

**Figure S19:** (a) Chronoamperometric results of photoelectrocatalysis of N<sub>2</sub> by using MoSe<sub>2</sub>@g-C<sub>3</sub>N<sub>4</sub> (5 wt%) in 0.1 M KOH electrolyte at potential ranging from 0 V to -0.5 V vs. RHE for 2 h under illumination, (b) Corresponding NH<sub>3</sub> yield rates and Faradaic efficiencies.

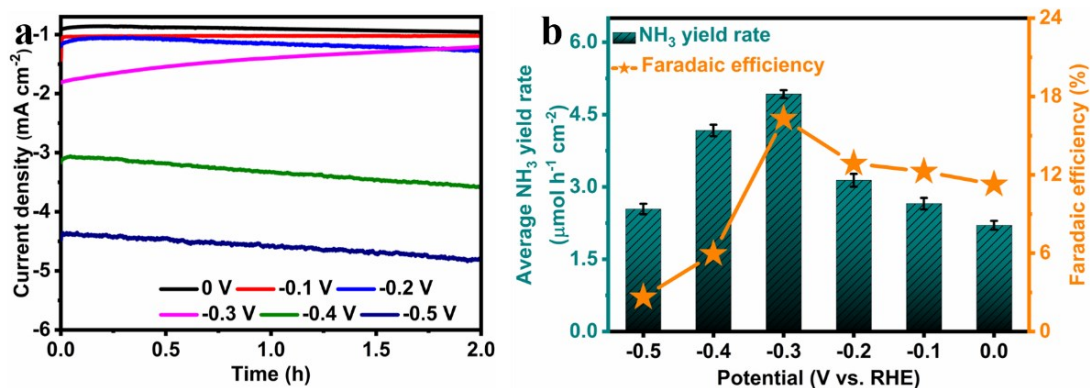

**Figure S20:** (a) Chronoamperometric results of photoelectrocatalysis of N<sub>2</sub> by using MoSe<sub>2</sub>@g-C<sub>3</sub>N<sub>4</sub> (9 wt%) in 0.1 M KOH electrolyte at potential ranging from 0 V to -0.5 V vs. RHE for 2 h under illumination, (b) Corresponding NH<sub>3</sub> yield rates and Faradaic efficiencies.

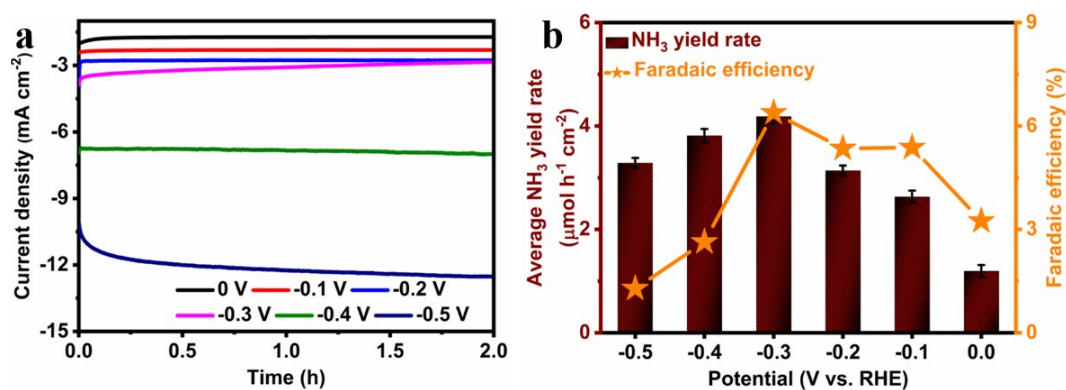

**Figure S21:** (a) Chronoamperometric results of photoelectrocatalysis of N<sub>2</sub> by using MoSe<sub>2</sub>@g-C<sub>3</sub>N<sub>4</sub> (11 wt%) in 0.1 M KOH electrolyte at potential ranging from 0 V to -0.5 V vs. RHE for 2h under illumination, (b) Corresponding NH<sub>3</sub> yield rates and Faradaic efficiencies.

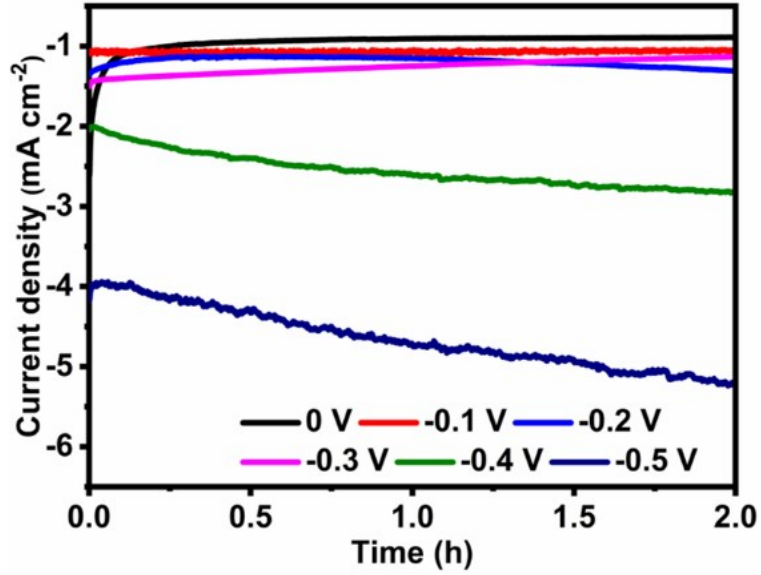

**Figure S22:** Chronoamperometric curves of MoSe<sub>2</sub>@g-C<sub>3</sub>N<sub>4</sub> (7 wt%) at different potentials under illumination.

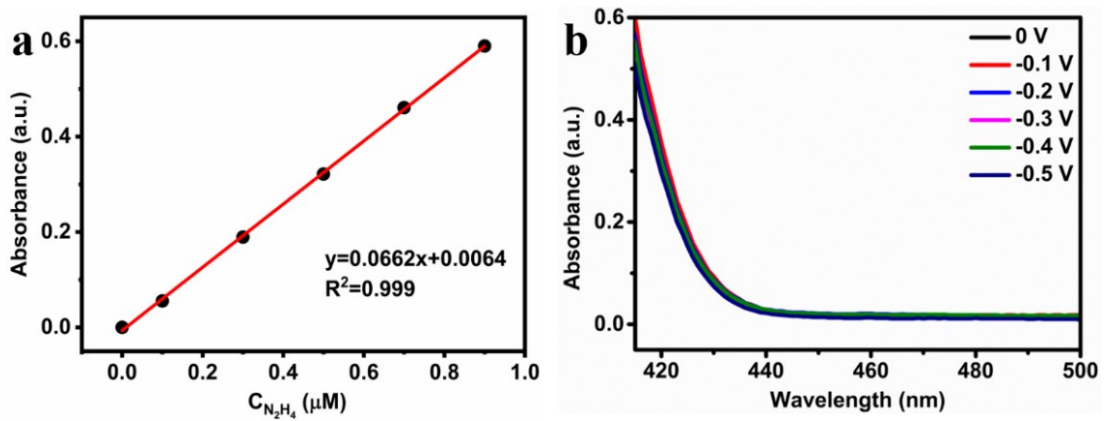

**Figure S23:** UV-vis absorption spectra of the electrolytes estimated by the method of Watt and Chrisp after PEC NRR at different potentials.



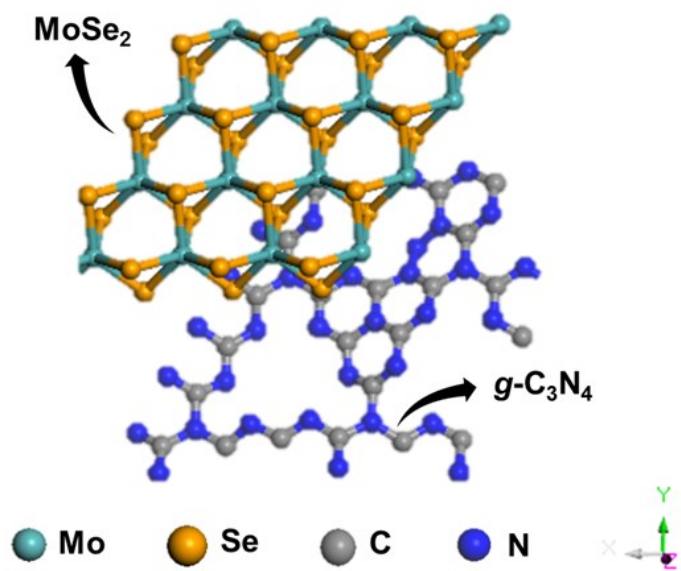

**Figure S24:** Structural model of MoSe<sub>2</sub>@g-C<sub>3</sub>N<sub>4</sub> heterojunctions.

**Table S2:** Formulation name, catalysis type, highest NH<sub>3</sub> yield rate and FE as well as electrolytes under ambient conditions. (Note: electrochemical; EC, photoelectrochemical; PEC).

| Sr. No. | Formulation                                                   | Catalysis type | Electrolyte                           | NH <sub>3</sub> yield rate            | V vs. RHE   | FE          | V vs. RHE   |
|---------|---------------------------------------------------------------|----------------|---------------------------------------|---------------------------------------|-------------|-------------|-------------|
|         |                                                               |                |                                       | $\mu\text{mol h}^{-1} \text{cm}^{-1}$ | V           | %           | V           |
| 1       | MoSe <sub>2</sub>                                             | EC             | 0.05 M H <sub>2</sub> SO <sub>4</sub> | 0.4                                   | -0.2        | 0.45        | 0           |
| 2       | MoSe <sub>2</sub>                                             | EC             | 0.1 M Na <sub>2</sub> SO <sub>4</sub> | 0.29                                  | -0.3        | 1.54        | -0.2        |
| 3       | MoSe <sub>2</sub>                                             | EC             | 0.1 M KOH                             | 1.19                                  | -0.3        | 3.03        | -0.3        |
| 4       | g-C <sub>3</sub> N <sub>4</sub>                               | PEC            | 0.1 M KOH                             | 2.21                                  | -0.3        | 4.48        | -0.3        |
| 5       | MoSe <sub>2</sub>                                             | PEC            | 0.1 M KOH                             | 2.84                                  | -0.3        | 5.75        | -0.3        |
| 6       | MoSe <sub>2</sub> @g-C <sub>3</sub> N <sub>4</sub> (1 wt %)   | PEC            | 0.1 M KOH                             | 2.89                                  | -0.3        | 5.79        | -0.3        |
| 7       | MoSe <sub>2</sub> @g-C <sub>3</sub> N <sub>4</sub> (3 wt %)   | PEC            | 0.1 M KOH                             | 3.82                                  | -0.3        | 13.2        | -0.3        |
| 8       | MoSe <sub>2</sub> @g-C <sub>3</sub> N <sub>4</sub> (5 wt %)   | PEC            | 0.1 M KOH                             | 4.7                                   | -0.3        | 18.7        | -0.3        |
| 9       | <b>MoSe<sub>2</sub>@g-C<sub>3</sub>N<sub>4</sub> (7 wt %)</b> | <b>PEC</b>     | <b>0.1 M KOH</b>                      | <b>7.72</b>                           | <b>-0.3</b> | <b>28.9</b> | <b>-0.3</b> |
| 10      | MoSe <sub>2</sub> @g-C <sub>3</sub> N <sub>4</sub> (9 wt %)   | PEC            | 0.1 M KOH                             | 4.92                                  | -0.3        | 16.2        | -0.3        |
| 11      | MoSe <sub>2</sub> @g-C <sub>3</sub> N <sub>4</sub> (11 wt %)  | PEC            | 0.1 M KOH                             | 4.18                                  | -0.3        | 6.38        | -0.3        |

**Table S3:** Summary of the representative reports on artificial electrochemical (EC) N<sub>2</sub> fixation under ambient conditions.

| Catalyst system                                                  | Electrolyte                           | NH <sub>3</sub> yield rate                                                                                                                                                                                                                                    | FE (%)      | Ref.             |
|------------------------------------------------------------------|---------------------------------------|---------------------------------------------------------------------------------------------------------------------------------------------------------------------------------------------------------------------------------------------------------------|-------------|------------------|
| <b>MoSe<sub>2</sub>@g-C<sub>3</sub>N<sub>4</sub></b>             | <b>0.1 M KOH</b>                      | <b>7.72 μmol h<sup>-1</sup> cm<sup>-2</sup></b><br><b>or</b><br><b>2.14 nmol s<sup>-1</sup> cm<sup>-2</sup></b><br><b>or</b><br><b>131.47 μg h<sup>-1</sup> cm<sup>-2</sup></b><br><b>or</b><br><b>131.47 μg h<sup>-1</sup> mg<sub>cat</sub><sup>-1</sup></b> | <b>28.9</b> | <b>This work</b> |
| 1T@2H MoSe <sub>2</sub>                                          | 0.1 M Na <sub>2</sub> SO <sub>4</sub> | 19.91 μg h <sup>-1</sup> mg <sub>cat</sub> <sup>-1</sup>                                                                                                                                                                                                      | 2.82        | 6                |
| MoSe <sub>2</sub>                                                | 0.1 M Na <sub>2</sub> SO <sub>4</sub> | 11.2 μg h <sup>-1</sup> mg <sub>cat</sub> <sup>-1</sup>                                                                                                                                                                                                       | 14.2        | 7                |
| R-WO <sub>3</sub> NSs                                            | 0.1 M HCl                             | 17.28 μg h <sup>-1</sup> mg <sub>cat</sub> <sup>-1</sup>                                                                                                                                                                                                      | 7.0         | 8                |
| Boron nanosheet                                                  | 0.1 M Na <sub>2</sub> SO <sub>4</sub> | 13.22 μg h <sup>-1</sup> mg <sub>cat</sub> <sup>-1</sup>                                                                                                                                                                                                      | 4.04        | 9                |
| AuCuB                                                            | 0.1 M Na <sub>2</sub> SO <sub>4</sub> | 13.2 μg h <sup>-1</sup> mg <sub>cat</sub> <sup>-1</sup>                                                                                                                                                                                                       | 12.78       | 10               |
| MoN                                                              | 0.1 M HCl                             | 3×10 <sup>-10</sup> mol s <sup>-1</sup> cm <sup>-2</sup>                                                                                                                                                                                                      | 1.15        | 11               |
| Bi <sub>4</sub> V <sub>2</sub> O <sub>11</sub> /CeO <sub>2</sub> | 0.1 M HCl                             | 23.21 μg h <sup>-1</sup> mg <sub>cat</sub> <sup>-1</sup>                                                                                                                                                                                                      | 10.16       | 12               |
| Nb <sub>2</sub> O <sub>5</sub> nanofiber                         | 0.1 M HCl                             | 43.6 μg h <sup>-1</sup> mg <sub>cat</sub> <sup>-1</sup>                                                                                                                                                                                                       | 9.26        | 13               |
| Au flowers                                                       | 0.1 M HCl                             | 25.57 μg h <sup>-1</sup> mg <sub>cat</sub> <sup>-1</sup>                                                                                                                                                                                                      | 6.05        | 14               |
| VO <sub>2</sub> hollow Microsphere                               | 0.1 M Na <sub>2</sub> SO <sub>4</sub> | 14.85 μg h <sup>-1</sup> mg <sub>cat</sub> <sup>-1</sup>                                                                                                                                                                                                      | 3.97        | 15               |
| MnO                                                              | 0.1 M Na <sub>2</sub> SO <sub>4</sub> | 1.1×10 <sup>-10</sup> mol s <sup>-1</sup> cm <sup>-2</sup>                                                                                                                                                                                                    | 8.02        | 16               |
| MoO <sub>3</sub>                                                 | 0.1 M HCl                             | 29.43 μg h <sup>-1</sup> mg <sub>cat</sub> <sup>-1</sup>                                                                                                                                                                                                      | 1.9         | 17               |
| S-doped carbon nanospheres                                       | 0.1 M Na <sub>2</sub> SO <sub>4</sub> | 19.07 μg h <sup>-1</sup> mg <sub>cat</sub> <sup>-1</sup>                                                                                                                                                                                                      | 7.47        | 18               |
| Rh NNs                                                           | 0.1 M KOH                             | 7.45 mg h <sup>-1</sup> cm <sup>-2</sup>                                                                                                                                                                                                                      | 0.21        | 19               |
| PdRu                                                             | 0.1 M KOH                             | 37.23 mg h <sup>-1</sup> mg <sup>-1</sup>                                                                                                                                                                                                                     | 1.85        | 20               |
| Ag nanosheet                                                     | 0.1 M HCl                             | 4.6×10 <sup>-11</sup> mol s <sup>-1</sup> cm <sup>-2</sup>                                                                                                                                                                                                    | 4.8         | 21               |
| Cu Dendritic                                                     | 0.1 M HCl                             | 25.63 μg h <sup>-1</sup> mg <sup>-1</sup>                                                                                                                                                                                                                     | 15.12       | 22               |
| Bi Nanosheets                                                    | 0.1 M Na <sub>2</sub> SO <sub>4</sub> | 23.4 μg h <sup>-1</sup> mg <sub>cat</sub> <sup>-1</sup>                                                                                                                                                                                                       | 19.8        | 23               |
| CoVP@NiFeV                                                       | 0.05 M H <sub>2</sub> SO <sub>4</sub> | 1.6 μmol h <sup>-1</sup> cm <sup>-2</sup>                                                                                                                                                                                                                     | 13.8        | 24               |
| Co-doped (NPC)                                                   | 0.1 M HCl                             | 0.97 μg h <sup>-1</sup> mg <sup>-1</sup>                                                                                                                                                                                                                      | 4.2         | 25               |
| Pd <sub>0.2</sub> Cu <sub>0.8</sub> /rGO                         | 0.1 M KOH                             | 2.80 μg h <sup>-1</sup> mg <sup>-1</sup>                                                                                                                                                                                                                      | 0.6         | 26               |
| Au-CNT                                                           | 0.1 M HCl                             | 57.7 μg h <sup>-1</sup> cm <sup>-2</sup>                                                                                                                                                                                                                      | 11.97       | 27               |
| Carbon nanotubes                                                 | 0.1 M LiClO <sub>4</sub>              | 32.33 μg h <sup>-1</sup> mg <sup>-1</sup>                                                                                                                                                                                                                     | 12.50       | 28               |
| Mn <sub>3</sub> O <sub>4</sub> @rGO                              | 0.1 M Na <sub>2</sub> SO <sub>4</sub> | 17.4 μg h <sup>-1</sup> mg <sup>-1</sup>                                                                                                                                                                                                                      | 3.52        | 29               |
| Pt                                                               | 2 M KOH                               | 0.19 μg h <sup>-1</sup> mg <sup>-1</sup>                                                                                                                                                                                                                      | 0.01        | 30               |
| Re <sub>2</sub> MnS <sub>6</sub>                                 | 0.1 M Na <sub>2</sub> SO <sub>4</sub> | 3.78 μg h <sup>-1</sup> mg <sub>cat</sub> <sup>-1</sup>                                                                                                                                                                                                       | 17.42       | 31               |
| NbO <sub>2</sub>                                                 | 0.05 M H <sub>2</sub> SO <sub>4</sub> | 11.6 μg h <sup>-1</sup> mg <sub>cat</sub> <sup>-1</sup>                                                                                                                                                                                                       | 32          | 32               |

**Table S4:** Summary of the representative reports on artificial photochemical (PC) N<sub>2</sub> fixation under ambient conditions.

| <b>Catalyst system</b>                             | <b>Electrolyte</b>                    | <b>NH<sub>3</sub> yield rate</b>           | <b>FE (%)</b> | <b>Ref.</b> |
|----------------------------------------------------|---------------------------------------|--------------------------------------------|---------------|-------------|
| MoSe <sub>2</sub> @g-C <sub>3</sub> N <sub>4</sub> | 0.1 M KOH                             | 7.72 μmol h <sup>-1</sup> cm <sup>-2</sup> | 28.9          | This work   |
| FeAl@3D Graphene                                   | Water                                 | 25.3 μmol h <sup>-1</sup> g <sup>-1</sup>  | –             | 33          |
| Bi <sub>5</sub> O <sub>7</sub> I nanosheets        | 0.1 M Na <sub>2</sub> SO <sub>4</sub> | 111.5 μmol h <sup>-1</sup> g <sup>-1</sup> | 5.1           | 34          |
| BiO quantum dots                                   | Water                                 | 1226 mmol h <sup>-1</sup> g <sup>-1</sup>  | –             | 35          |
| Bi <sub>5</sub> O <sub>7</sub> Br nanotubes        | Water                                 | 1380 mmol h <sup>-1</sup> g <sup>-1</sup>  | 2.3           | 36          |
| Bi <sub>2</sub> MoO <sub>6</sub>                   | Water and                             | 1300 μmol h <sup>-1</sup> g <sup>-1</sup>  | 0.73          | 37          |
| BiOCl                                              | 0.01 M NaClO <sub>4</sub>             | 4.62 μmol h <sup>-1</sup> g <sup>-1</sup>  | 4.3           | 38          |
| Mo-doped W <sub>18</sub> O <sub>49</sub>           | 0.5 M Na <sub>2</sub> SO <sub>4</sub> | 195.5 μmol h <sup>-1</sup> g <sup>-1</sup> | 0.33          | 39          |
| S, N co-doped (BiO) <sub>2</sub> CO <sub>3</sub>   | CH <sub>3</sub> CN and water          | 38.2 μmol h <sup>-1</sup> g <sup>-1</sup>  | 0.006         | 40          |
| BiOBr nanosheets                                   | 0.5 M Na <sub>2</sub> SO <sub>4</sub> | 10.42 mmol h <sup>-1</sup> g <sup>-1</sup> | 0.23          | 41          |
| Ultrathin MoS <sub>2</sub>                         | Ethanol and water                     | 325 μmol h <sup>-1</sup> g <sup>-1</sup>   | –             | 42          |

## References

1. J. Bisquert, A. Zaban, M. Greenshtein and I. Mora-Seró, *Journal of the American Chemical Society*, 2004, **126**, 13550-13559.
2. G. Kresse and D. Joubert, *Physical review b*, 1999, **59**, 1758.
3. J. P. Perdew, K. Burke and M. Ernzerhof, *Physical Review Letters*, 1996, **77**, 3865.
4. S. Grimme, J. Antony, S. Ehrlich and H. Krieg, *The Journal of chemical physics*, 2010, **132**, 154104.
5. X. Yu, P. Han, Z. Wei, L. Huang, Z. Gu, S. Peng, J. Ma and G. Zheng, *Joule*, 2018, **2**, 1610-1622.
6. Z. Wu, R. Zhang, H. Fei, R. Liu, D. Wang and X. Liu, *Applied Surface Science*, 2020, **532**, 147372.
7. L. Yang, H. Wang, X. Wang, W. Luo, C. Wu, C.-a. Wang and C. Xu, *Inorganic Chemistry*, 2020, DOI: 10.1021/acs.inorgchem.0c02058.
8. W. Kong, R. Zhang, X. Zhang, L. Ji, G. Yu, T. Wang, Y. Luo, X. Shi, Y. Xu and X. Sun, *Nanoscale*, 2019, **11**, 19274-19277.
9. X. Zhang, T. Wu, H. Wang, R. Zhao, H. Chen, T. Wang, P. Wei, Y. Luo, Y. Zhang and X. Sun, *ACS Catalysis*, 2019, **9**, 4609-4615.
10. Z. Wang, J. Niu, Y. Xu, L. Wang, H. Wang and H. Liu, *ACS Sustainable Chemistry & Engineering*, 2020, **8**, 12588-12594.
11. L. Zhang, X. Ji, X. Ren, Y. Ma, X. Shi, Z. Tian, A. M. Asiri, L. Chen, B. Tang and X. Sun, *Advanced Materials*, 2018, **30**, 1800191.
12. C. Lv, C. Yan, G. Chen, Y. Ding, J. Sun, Y. Zhou and G. Yu, *Angewandte Chemie International Edition*, 2018, **57**, 6073-6076.
13. J. Han, Z. Liu, Y. Ma, G. Cui, F. Xie, F. Wang, Y. Wu, S. Gao, Y. Xu and X. Sun, *Nano Energy*, 2018, **52**, 264-270.
14. Z. Wang, Y. Li, H. Yu, Y. Xu, H. Xue, X. Li, H. Wang and L. Wang, *ChemSusChem*, 2018, **11**, 3480-3485.
15. R. Zhang, H. Guo, L. Yang, Y. Wang, Z. Niu, H. Huang, H. Chen, L. Xia, T. Li and X. Shi, *ChemElectroChem*, 2019, **6**, 1014-1018.
16. Z. Wang, F. Gong, L. Zhang, R. Wang, L. Ji, Q. Liu, Y. Luo, H. Guo, Y. Li and P. Gao, *Advanced Science*, 2019, **6**, 1801182.
17. J. Han, X. Ji, X. Ren, G. Cui, L. Li, F. Xie, H. Wang, B. Li and X. Sun, *Journal of Materials Chemistry A*, 2018, **6**, 12974-12977.
18. L. Xia, X. Wu, Y. Wang, Z. Niu, Q. Liu, T. Li, X. Shi, A. M. Asiri and X. Sun, *Small Methods*, 2019, **3**, 1800251.
19. H.-M. Liu, S.-H. Han, Y. Zhao, Y.-Y. Zhu, X.-L. Tian, J.-H. Zeng, J.-X. Jiang, B. Y. Xia and Y. Chen, *Journal of Materials Chemistry A*, 2018, **6**, 3211-3217.
20. H. Wang, Y. Li, C. Li, K. Deng, Z. Wang, Y. Xu, X. Li, H. Xue and L. Wang, *Journal of Materials Chemistry A*, 2019, **7**, 801-805.
21. H. Huang, L. Xia, X. Shi, A. M. Asiri and X. Sun, *Chemical Communications*, 2018, **54**, 11427-11430.
22. C. Li, S. Mou, X. Zhu, F. Wang, Y. Wang, Y. Qiao, X. Shi, Y. Luo, B. Zheng, Q. Li and X. Sun, *Chemical Communications*, 2019, **55**, 14474-14477.
23. J. Wang, Y. Ren, M. Chen, G. Cao, Z. Chen and P. Wang, *Journal of Alloys and Compounds*, 2020, 154668.

24. M. Arif, G. Yasin, L. Luo, W. Ye, M. A. Mushtaq, X. Fang, X. Xiang, S. Ji and D. Yan, *Applied Catalysis B: Environmental*, 2020, **265**, 118559.
25. P. Song, H. Wang, L. Kang, B. Ran, H. Song and R. Wang, *Chemical Communications*, 2019, **55**, 687-690.
26. M. M. Shi, D. Bao, S. J. Li, B. R. Wulan, J. M. Yan and Q. Jiang, *Advanced Energy Materials*, 2018, **8**, 1800124.
27. X. Zhao, Z. Yang, A. V. Kuklin, G. V. Baryshnikov, H. Agren, X. Zhou and H. Zhang, *ACS Applied Materials & Interfaces*, 2020, DOI: 10.1021/acsami.0c11487.
28. J. Zhao, B. Wang, Q. Zhou, H. Wang, X. Li, H. Chen, Q. Wei, D. Wu, Y. Luo and J. You, *Chemical Communications*, 2019, **55**, 4997-5000.
29. H. Huang, F. Gong, Y. Wang, H. Wang, X. Wu, W. Lu, R. Zhao, H. Chen, X. Shi, A. M. Asiri, T. Li, Q. Liu and X. Sun, *Nano Research*, 2019, **12**, 1093-1098.
30. B. L. Sheets and G. G. Botte, *Chemical Communications*, 2018, **54**, 4250-4253.
31. Y. Fu, T. Li, G. Zhou, J. Guo, Y. Ao, Y. Hu, J. Shen, L. Liu and X. Wu, *Nano Letters*, 2020, **20**, 4960-4967.
32. L. Huang, J. Wu, P. Han, A. M. Al - Enizi, T. M. Almutairi, L. Zhang and G. Zheng, *Small Methods*, 2019, **3**, 1800386.
33. Y. Lu, Y. Yang, T. Zhang, Z. Ge, H. Chang, P. Xiao, Y. Xie, L. Hua, Q. Li and H. Li, *ACS nano*, 2016, **10**, 10507-10515.
34. Y. Bai, L. Ye, T. Chen, L. Wang, X. Shi, X. Zhang and D. Chen, *ACS applied materials & interfaces*, 2016, **8**, 27661-27668.
35. S. Sun, Q. An, W. Wang, L. Zhang, J. Liu and W. A. Goddard III, *Journal of Materials Chemistry A*, 2017, **5**, 201-209.
36. S. Wang, X. Hai, X. Ding, K. Chang, Y. Xiang, X. Meng, Z. Yang, H. Chen and J. Ye, *Advanced Materials*, 2017, **29**, 1701774.
37. Y. Hao, X. Dong, S. Zhai, H. Ma, X. Wang and X. Zhang, *Chemistry—A European Journal*, 2016, **22**, 18722-18728.
38. H. Li, J. Shang, J. Shi, K. Zhao and L. Zhang, *Nanoscale*, 2016, **8**, 1986-1993.
39. N. Zhang, A. Jalil, D. Wu, S. Chen, Y. Liu, C. Gao, W. Ye, Z. Qi, H. Ju and C. Wang, *Journal of the American Chemical Society*, 2018, **140**, 9434-9443.
40. P. Ding, J. Di, X. Chen, M. Ji, K. Gu, S. Yin, G. Liu, F. Zhang, J. Xia and H. Li, *ACS Sustainable Chemistry & Engineering*, 2018, **6**, 10229-10240.
41. H. Li, J. Shang, Z. Ai and L. Zhang, *Journal of the American Chemical Society*, 2015, **137**, 6393-6399.
42. S. Sun, X. Li, W. Wang, L. Zhang and X. Sun, *Applied Catalysis B: Environmental*, 2017, **200**, 323-329.
